# Supplementary material for: A novel fabrication of a polymeric ionic liquid hybrid film modified electrode and its successful application to the electrogeneration of a superoxide anion in aqueous media
Source: Royal Society of Chemistry journal article supplement (doi:10.1039/c4cc08410a), 2015-01-01
Supplement: c4cc08410a1.pdf [file c4cc08410a1.pdf]

Electronic Supplementary Information (ESI)

**A novel fabrication of polymeric ionic liquid hybrid film modified electrode and its successful application to electrogeneration of superoxide anion in aqueous media**

Dilani Nilushika,<sup>a</sup> Mohamed I. Awad,<sup>b</sup> Mahmoud M. Saleh,<sup>b</sup> Takeyoshi Okajima,<sup>a</sup> Lanqun Mao,<sup>c</sup> and Takeo Ohsaka<sup>a</sup>

- a Department of Electronic Chemistry, Interdisciplinary Graduate School of Science and Engineering, Tokyo Institute of Technology, 4259 Nagatsuta, Midori-Ku, Yokohama 226-8502, Japan
- b Chemistry Department, Faculty of Science, Cairo University, Cairo 12613, Egypt
- c Beijing National Laboratory for Molecular Science, Institute of Chemistry, Chinese Academy of Science, 2 Zhongguancun North First street, Beijing 100190, P.R. China

Fig. S1 Consecutive CVs (100 cycles) at GC electrode in 0.2 M  $\text{Na}_2\text{SO}_4 + \text{H}_2\text{SO}_4$  aqueous solution (pH 1.0) containing 0.2 M DMA at  $50 \text{ mVs}^{-1}$  under Ar atmosphere.

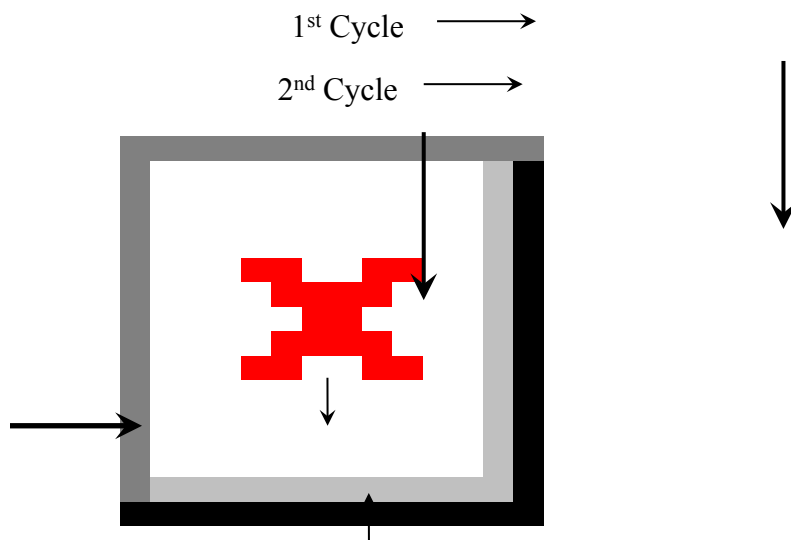

Fig. S2 LSM image of PDMA film prepared in Fig.S1.

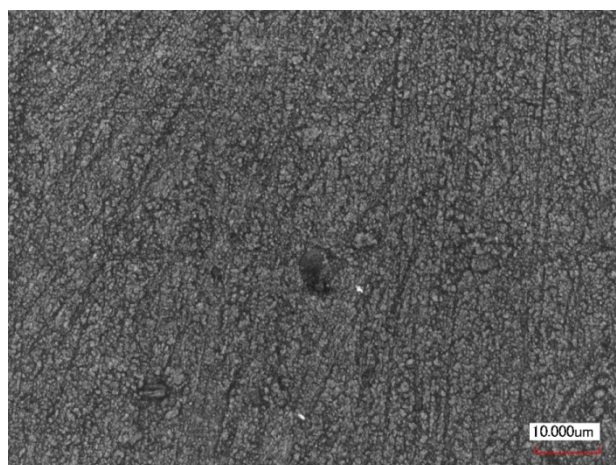

Fig. S3 Surface profiles of the PDMA films prepared in  $[MPP]^+[N(Tf)_2]^-$  using (A) 100 and (B) 200 potential cycles and (C) in 0.2 M  $Na_2SO_4 + H_2SO_4$  aqueous solution (pH 1.0) in the same way as in Fig. S1.

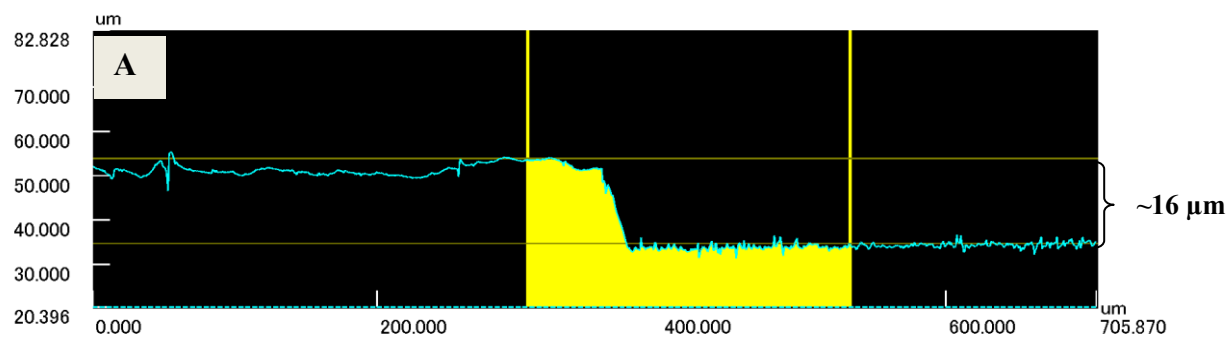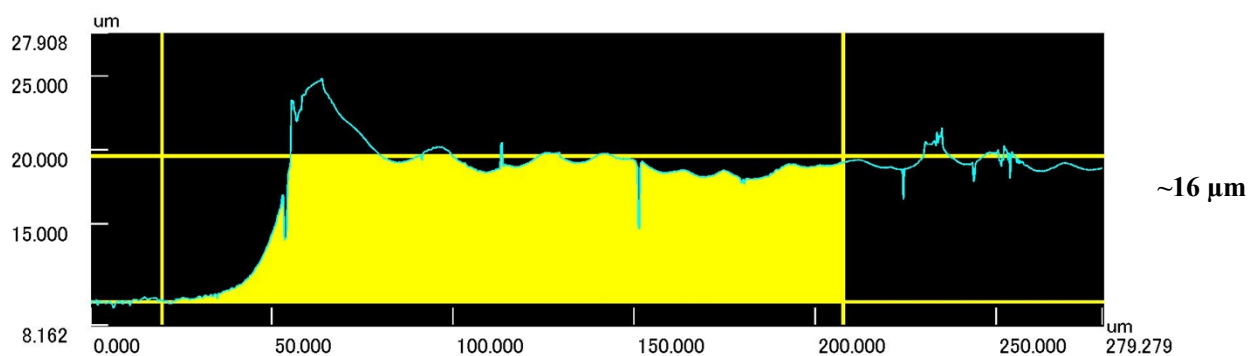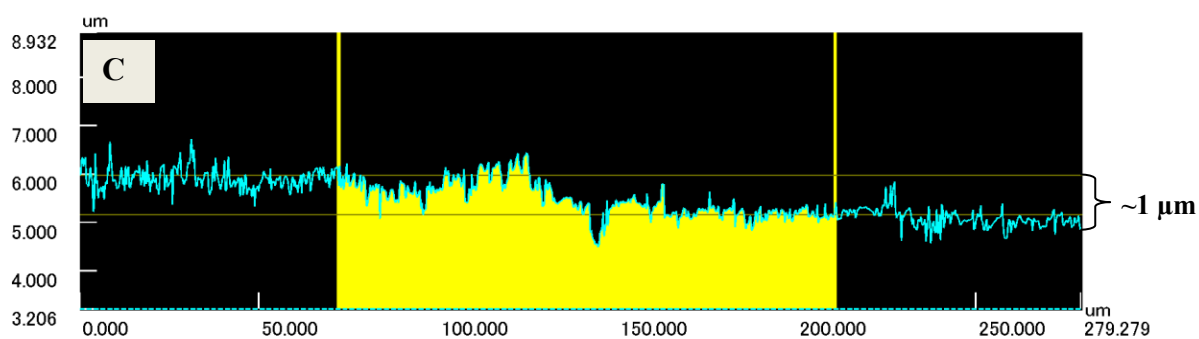

Fig.S4 Deconvoluted N1s spectra of [MPP]<sup>+</sup>[N(Tf)<sub>2</sub>]<sup>-</sup> / GC

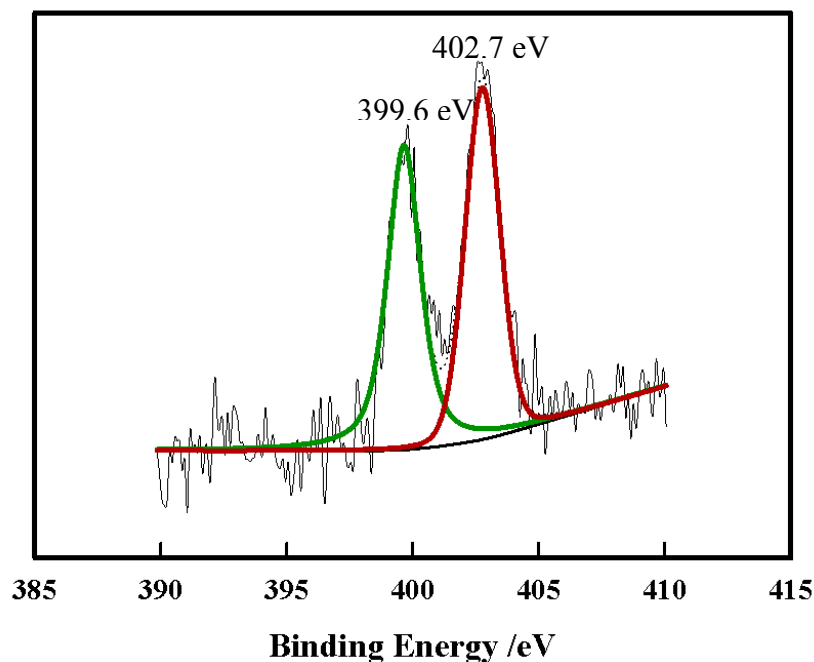

The XPS spectra were recorded with a Shimadzu ESCA-3400 spectrophotometer equipped with ultra high vacuum system. The excitation X-ray was Mg-K $\alpha$  yielding photons of 1253.6 eV that generate at 10 KV anode potential and 20 mA emission current. To compensate surface charging affects, the binding energy of C 1s was set as 285.0 eV and used as a reference for the calibration of other peak positions.

The deconvolution of the XPS peaks into different components was made after subtraction of the background using Shirley method. The developed curve-fitting programs permitted the variation of the parameters such as Gaussian/Lorentzian ratio, the full width at half maximum (FWHM), the position and intensity of the contribution. These parameters were optimized by a computer program giving the best fit to the experimental data.
